# Supplementary material for: Inflammation-related genes up-regulated in schizophrenia brains
Source: PubMed Central journal article supplement (PMC2080573; doi:10.1186/1471-244x-7-46), 2007-09-06
Supplement: 1471-244X-7-46-S1.pdf [file 1471-244X-7-46-S1.pdf]

| Source        | Diagnosis     | GENDER | AGE | PMI | Agonal state             | AGE ONSI | BRAIN pH |
|---------------|---------------|--------|-----|-----|--------------------------|----------|----------|
| Stanley Brain | control       | M      | 52  | 28  | Cardiac                  |          | 6,5      |
| Stanley Brain | control       | F      | 44  | 25  | Cardiac                  |          | 6,3      |
| Stanley Brain | control       | M      | 59  | 26  | Cardiac                  |          | 6,4      |
| Stanley Brain | control       | M      | 52  | 8   | Cardiac                  |          | 6,5      |
| Stanley Brain | control       | M      | 52  | 22  | Cardiac                  |          | 6,2      |
| Stanley Brain | control       | M      | 53  | 28  | Cardiac                  |          | 6,2      |
| Stanley Brain | control       | M      | 44  | 10  | Cardiac                  |          | 6,4      |
| Stanley Brain | control       | F      | 35  | 23  | Cardiac                  |          | 6,6      |
| Stanley Brain | control       | M      | 41  | 11  | Pulmonary embolus        |          | 6        |
| Stanley Brain | control       | M      | 42  | 27  | Cardiac                  |          | 6,6      |
| Stanley Brain | control       | F      | 35  | 40  | Pulmonary embolus        |          | 5,8      |
| Stanley Brain | control       | F      | 68  | 13  | Pulmonary embolus        |          | 6,3      |
| Stanley Brain | control       | M      | 58  | 27  | Cardiac                  |          | 6        |
| Stanley Brain | control       | F      | 29  | 42  | Motor vehicle accident   |          | 6,2      |
| Stanley Brain | control       | F      | 57  | 26  | Motor vehicle accident   |          | 6        |
| Stanley Brain | schizophrenia | F      | 30  | 60  | Suicide: jumped          | 22       | 6,2      |
| Stanley Brain | schizophrenia | M      | 52  | 61  | Cardiac                  | 20       | 6        |
| Stanley Brain | schizophrenia | M      | 30  | 32  | Pneumonia                | 13       | 5,8      |
| Stanley Brain | schizophrenia | F      | 62  | 26  | Motor vechicle accident  | 38       | 6,1      |
| Stanley Brain | schizophrenia | F      | 60  | 40  | Cardiac                  | 15       | 6,2      |
| Stanley Brain | schizophrenia | M      | 60  | 31  | Accidental drowning      | 27       | 6,2      |
| Stanley Brain | schizophrenia | M      | 32  | 19  | Acute alcohol intoxicati | 27       | 6,1      |
| Stanley Brain | schizophrenia | M      | 31  | 14  | Suicide: jumped          | 18       | 5,8      |
| Stanley Brain | schizophrenia | F      | 58  | 26  | Cardiac                  | 42       | 5,9      |
| Stanley Brain | schizophrenia | M      | 25  | 32  | Suicide: hanged          | 20       | 6,6      |

| Source        | Diagnosis     | GENDER | AGE | PMI | Agonal state      | AGE ONSET | BRAIN pH |
|---------------|---------------|--------|-----|-----|-------------------|-----------|----------|
| Stanley Brain | schizophrenia | M      | 44  | 50  | Cardiac           | 17        | 6,5      |
| Stanley Brain | schizophrenia | M      | 44  | 29  | Pulmonary disease | 21        | 5,9      |
| Stanley Brain | schizophrenia | F      | 56  | 12  | Suicide: overdose | 24        | 6,4      |
| Stanley Brain | schizophrenia | M      | 35  | 35  | Cardiac           | 19        | 6,5      |
| Stanley Brain | schizophrenia | F      | 49  | 38  | Cardiac           | 25        | 6,2      |
| Harvard Brain | control       | M      | 66  | 23  |                   |           |          |
| Harvard Brain | control       | M      | 24  | 13  |                   |           |          |
| Harvard Brain | control       | M      | 81  | 19  |                   |           |          |
| Harvard Brain | control       | F      | 46  | 23  |                   |           |          |
| Harvard Brain | control       | F      | 50  | 21  |                   |           |          |
| Harvard Brain | control       | M      | 66  | 19  |                   |           |          |
| Harvard Brain | control       | M      | 40  | 28  |                   |           |          |
| Harvard Brain | control       | M      | 48  | 15  |                   |           |          |
| Harvard Brain | control       | M      | 44  | 23  |                   |           |          |
| Harvard Brain | control       | M      | 47  | 19  |                   |           |          |
| Harvard Brain | control       | M      | 38  | 22  |                   |           |          |
| Harvard Brain | control       | M      | 85  | 14  |                   |           |          |
| Harvard Brain | control       | M      | 69  | 9,2 |                   |           |          |
| Harvard Brain | control       | F      | 69  | 21  |                   |           |          |
| Harvard Brain | control       | F      | 44  | 11  |                   |           |          |
| Harvard Brain | control       | F      | 75  | 26  |                   |           |          |
| Harvard Brain | schizophrenia | F      | 84  | 12  |                   |           |          |
| Harvard Brain | schizophrenia | F      | 82  | 20  |                   |           |          |
| Harvard Brain | schizophrenia | F      | 66  | 7,2 |                   |           |          |
| Harvard Brain | schizophrenia | M      | 44  | 18  |                   |           |          |
| Harvard Brain | schizophrenia | F      | 49  | 29  |                   |           |          |
| Harvard Brain | schizophrenia | F      | 74  | 28  |                   |           |          |

| Source        | Diagnosis     | GENDER | AGE | PMI | Agonal state                    | AGE ONSET | BRAIN pH |
|---------------|---------------|--------|-----|-----|---------------------------------|-----------|----------|
| Harvard Brain | schizophrenia | M      | 66  | 21  |                                 |           |          |
| Harvard Brain | schizophrenia | M      | 69  | 18  |                                 |           |          |
| Harvard Brain | schizophrenia | M      | 42  | 14  |                                 |           |          |
| Harvard Brain | schizophrenia | M      | 46  | 30  |                                 |           |          |
| Harvard Brain | schizophrenia | M      | 44  | 19  |                                 |           |          |
| Harvard Brain | schizophrenia | M      | 35  | 28  |                                 |           |          |
| Harvard Brain | schizophrenia | M      | 46  | 19  |                                 |           |          |
| Harvard Brain | schizophrenia | M      | 26  | 16  |                                 |           |          |
| Harvard Brain | schizophrenia | M      | 47  | 19  |                                 |           |          |
| Harvard Brain | schizophrenia | F      | 67  | 22  |                                 |           |          |
| Maudsley Inst | control       | M      | 57  | 21  | Mycocardial Infarction          |           |          |
| Maudsley Inst | control       | M      | 78  | 25  | Coronary Artery Occlusion       |           |          |
| Maudsley Inst | control       | M      | 63  | 26  | Coronary Artery Occlusion       |           |          |
| Maudsley Inst | control       | F      | 71  | 30  | Pulmonary Embolism              |           |          |
| Maudsley Inst | control       | M      | 75  | 85  | N/A                             |           |          |
| Maudsley Inst | control       | F      | 86  | 70  | Peritonitis                     |           |          |
| Maudsley Inst | control       | M      | 56  | 51  | Gastrointestinal Bleed          |           |          |
| Maudsley Inst | control       | M      | 77  | 96  | Mycocardial Infarction          |           |          |
| Maudsley Inst | control       | F      | 62  | 81  | Haemathorax                     |           |          |
| Maudsley Inst | control       | M      | 69  | 52  | Aortic Aneurism                 |           |          |
| Maudsley Inst | control       | M      | 49  | 44  | Pulmonary Oedema                |           |          |
| Maudsley Inst | control       | F      | 73  | 70  | Pelvic carcinoma                |           |          |
| Maudsley Inst | control       | F      | 96  | 16  | Chronic Ischaemic heart disease |           |          |
| Maudsley Inst | control       | F      | 82  | 48  | Haemopericardium                |           |          |
| Maudsley Inst | control       | F      | 80  | 31  | Left Ventricular Failure        |           |          |
| Maudsley Inst | control       | M      | 64  | 48  | Pulmonary Oedema                |           |          |
| Maudsley Inst | control       | F      | 80  | 31  | Pulmonary Embolism              |           |          |

| Source        | Diagnosis     | GENDER | AGE | PMI | Agonal state              | AGE ONSET | BRAIN pH |
|---------------|---------------|--------|-----|-----|---------------------------|-----------|----------|
| Maudsley Inst | control       | M      | 21  | 37  | Sudden accident           |           |          |
| Maudsley Inst | control       | F      | 20  | 38  | Sudden accident           |           |          |
| Maudsley Inst | control       | F      | 75  | 51  | Pulmonary Infarction      |           |          |
| Maudsley Inst | control       | F      | 71  | 91  | Cardiorespiratory failure |           |          |
| Maudsley Inst | control       | M      | 48  | 60  | Ruptured Aortic Aneurism  |           |          |
| Maudsley Inst | control       | M      | 62  | 91  | Ischaemic heart disease   |           |          |
| Maudsley Inst | control       | F      | 90  | 30  | Mycocardial Infarction    |           |          |
| Maudsley Inst | schizophrenia | M      | 70  | 48  | Bronchopneumonia          |           |          |
| Maudsley Inst | schizophrenia | F      | 75  | 44  | Bronchopneumonia          |           |          |
| Maudsley Inst | schizophrenia | M      | 64  | 84  | Pulmonary Embolus         |           |          |
| Maudsley Inst | schizophrenia | F      | 71  | 67  | Pulmonary Embolus         |           |          |
| Maudsley Inst | schizophrenia | F      | 70  | 100 | Bronchopneumonia          |           |          |
| Maudsley Inst | schizophrenia | F      | 87  | 7   | Bronchopneumonia          |           |          |
| Maudsley Inst | schizophrenia | M      | 46  | 38  | Multiple injuries         |           |          |
| Maudsley Inst | schizophrenia | F      | 69  | 24  | N/A                       |           |          |
| Maudsley Inst | schizophrenia | M      | 62  | 36  | Pulmonary tuberculosis    |           |          |
| Maudsley Inst | schizophrenia | F      | 76  | 97  | Bronchopneumonia          |           |          |
| Maudsley Inst | schizophrenia | M      | 67  | 24  | Mycocardial Infarction    |           |          |
| Maudsley Inst | schizophrenia | M      | 49  | 24  | Mycocardial Infarction    |           |          |
| Maudsley Inst | schizophrenia | F      | 49  | 24  | Perforated duodenal       |           |          |
| Maudsley Inst | schizophrenia | M      | 31  | 27  | Multiple organ failure    |           |          |
| Maudsley Inst | schizophrenia | F      | 34  | 23  | Acute Pulmonary oedema    |           |          |
| Maudsley Inst | schizophrenia | M      | 51  | 44  | Mycocardial Infarction    |           |          |
| Maudsley Inst | schizophrenia | M      | 64  | 48  | Acute Liver failure       |           |          |
| Maudsley Inst | schizophrenia | F      | 84  | 42  | Bronchopneumonia          |           |          |
| Maudsley Inst | schizophrenia | M      | 45  | 45  | Intra-abdominal sepsis    |           |          |
| Maudsley Inst | schizophrenia | M      | 87  | 48  | Bronchopneumonia          |           |          |

| Source        | Diagnosis     | GENDER | AGE | PMI | Agonal state            | AGE ONSET | BRAIN pH |
|---------------|---------------|--------|-----|-----|-------------------------|-----------|----------|
| Maudsley Inst | schizophrenia | F      | 32  | 22  | Pulmonary Embolus       |           |          |
| Maudsley Inst | schizophrenia | M      | 35  | 67  | Bronchopneumonia        |           |          |
| Maudsley Inst | schizophrenia | F      | 75  | 50  | Cardiovascular accident |           |          |
| Maudsley Inst | schizophrenia | M      | 62  | 48  | Ischaemic heart disease |           |          |

| CNS MEDS AT DEATH                              | CN | CN | SUBSTANCE ABUSE                                                              |
|------------------------------------------------|----|----|------------------------------------------------------------------------------|
| None                                           |    |    | Alcohol abuse when younger but abstinent last 8 years. No use of drugs.      |
| None                                           |    |    | Alcohol use light; Occasional marihuana in younger years.                    |
| None                                           |    |    | 2-3 beers each night but caused no problems and liver unremarkable; No use   |
| None                                           |    |    | Alcohol use light; No use of drugs.                                          |
| None                                           |    |    | 4-6 beers /day but never missed work and liver unremarkable. No use of dru   |
| None                                           |    |    | Alcohol abuse in 20s but abstinent for over 30 years. In 20s tried marihuana |
| None                                           |    |    | Alcohol use light; No use of drugs.                                          |
| None                                           |    |    | Alcohol use light; No use of drugs.                                          |
| None                                           |    |    | Alcohol use light; Used marihuana "a few times" in college.                  |
| None                                           |    |    | Alcohol use light; No use of drugs.                                          |
| None                                           |    |    | Alcohol use light; No use of drugs.                                          |
| None                                           |    |    | Alcohol use light; No use of drugs.                                          |
| None                                           |    |    | 2 beers /day; No use of drugs.                                               |
| Saw counselor for weight control               |    |    | Alcohol use light; no use of drugs.                                          |
| None                                           |    |    | Alcohol use light; No use of drugs.                                          |
| Thiothixene, desipramine                       |    |    | Marihuana abuse.                                                             |
| None; untreated for over 20 yrs.               |    |    | No use of alcohol; No use of drugs.                                          |
| Risperidone, thioridazine                      |    |    | Moderate use of alcohol; No use of drugs.                                    |
| None; untreated for several months             |    |    | Light use of alcohol; No use of drugs.                                       |
| None; had ECT but probably never treated other |    |    | No use of alcohol; No use of drugs.                                          |
| Thioridazine, amitriptyline                    |    |    | No use of alcohol; No use of drugs.                                          |
| Clozapine                                      |    |    | Alcohol abuse; Amphetamine abuse.                                            |
| Clozapine                                      |    |    | Light use of alcohol; No use of drugs.                                       |
| Haloperidol, iphenhydramine                    |    |    | Past alcohol abuse; No use of drugs.                                         |
| Risperidone, paroxetine                        |    |    | Past alcohol abuse and marihuana use.                                        |







| CNS MEDS AT DEATH      | CNCN   | SUBSTANCE ABUSE |
|------------------------|--------|-----------------|
| none                   |        |                 |
| none                   |        |                 |
| none                   |        |                 |
| none                   |        |                 |
| none                   |        |                 |
| none                   |        |                 |
| none                   |        |                 |
| PROMAZINE              |        |                 |
| CHLORPROMAZINE         | L<br>O |                 |
| none                   |        |                 |
| CHLORPROMAZINE         | P<br>E |                 |
| TRIFLUOPERAZINE        | M<br>O | TR              |
| none                   |        |                 |
| SULPIRIDE              |        |                 |
| none                   |        |                 |
| none                   |        |                 |
| HALOPERIDOL            |        |                 |
| STELAZINE              | D<br>S | M<br>GA         |
| CHLORPROMAZINE         | S<br>U | M<br>DE         |
| none                   |        |                 |
| CHLORPROMAZINE         |        |                 |
| NA, data not available |        |                 |
| THIORIDAZINE           | T<br>U |                 |
| none                   |        |                 |
| none                   |        |                 |
| NA, data not available |        |                 |
| STELAZINE              | S<br>O |                 |

| CNS MEDS AT DEATH | CN | CN | SUBSTANCE ABUSE |
|-------------------|----|----|-----------------|
| CHLORPROMAZINE    | S  |    |                 |
| TRIFLUOPERAZINE   | U  |    |                 |
| TRIFLUOPERAZINE   |    |    |                 |
| none              |    |    |                 |

| smoker |
|--------|
| NS     |
| S      |
| S      |
| NS     |
| S      |
| NS     |
| U      |
| U      |
| U      |
| U      |
| U      |
| U      |
| NS     |
| U      |
| U      |
| U      |
| S      |
| U      |
| NS     |
| NS     |
| U      |
| U      |
| S      |
| NS     |
| NS     |
| S      |

| smoker |
|--------|
| S      |
| S      |
| S      |
| NS     |
| S      |

smoker

smoker

smoker
